# Supplementary material for: Retinopathy progression and the risk of end-stage kidney disease: results from a longitudinal Japanese cohort of 232 patients with type 2 diabetes and biopsy-proven diabetic kidney disease
Source: PubMed Central journal article supplement — BMJ Open Diabetes Res Care. 2019 Nov 2;7(1):e000726. doi: 10.1136/bmjdrc-2019-000726 (PMC6861100; doi:10.1136/bmjdrc-2019-000726), 2019-11-02
Supplement: bmjdrc-2019-000726supp001.pdf [file bmjdrc-2019-000726supp001.pdf]

Table S1. Baseline clinical and pathological characteristics among patients with and without diabetic macular edema

|                                        | Total<br>(n=232) | No DME<br>(n=189) | DME<br>(n=43)  | P-value |
|----------------------------------------|------------------|-------------------|----------------|---------|
| Clinical characteristics               |                  |                   |                |         |
| Age (year)                             | 59 (50, 67)      | 60 (51, 67)       | 56 (44, 63)    | 0.060   |
| Male (%)                               | 78               | 78                | 74             | 0.58    |
| BMI (kg/m <sup>2</sup> )               | 24 (22, 27)      | 24 (22, 27)       | 24 (21, 27)    | 0.62    |
| Diabetes duration (year)               | 14 (10, 21)      | 15 (10, 22)       | 13 (9, 18)     | 0.28    |
| Past history of CVD (%)                | 24               | 24                | 21             | 0.64    |
| Ever having Smoked (%)                 | 61               | 61                | 62             | 0.95    |
| RAAS inhibitors use (%)                | 66               | 65                | 70             | 0.52    |
| Glucose lowering agents use (%)        | 81               | 79                | 88             | 0.15    |
| Statin use (%)                         | 29               | 29                | 31             | 0.84    |
| Systolic blood pressure (mmHg)         | 145 (132, 160)   | 143 (131, 158)    | 153 (137, 170) | 0.012   |
| Diastolic blood pressure (mmHg)        | 80 (72, 90)      | 80 (72, 90)       | 82 (77, 90)    | 0.13    |
| Hemoglobin A1c (%)                     | 7.3 (6.4, 8.9)   | 7.3 (6.4, 8.9)    | 7.2 (6.3, 9.1) | 0.98    |
| (mmol/mol)                             | 56 (46, 74)      | 56 (46, 74)       | 55 (45, 76)    | 0.98    |
| Total cholesterol (mmol/L)             | 209 (174, 253)   | 206 (171, 250)    | 214 (190, 261) | 0.053   |
| Triglycerides (mmol/L)                 | 157 (114, 215)   | 156 (114, 214)    | 171 (117, 230) | 0.61    |
| LDL-C (mmol/L)                         | 125 (100, 171)   | 121 (99, 166)     | 142 (121, 180) | 0.025   |
| HDL-C (mmol/L)                         | 40 (33, 50)      | 39 (32, 49)       | 43 (35, 57)    | 0.34    |
| Uric acid (mg/dL)                      | 6.6 (5.6, 7.5)   | 6.6 (5.6, 7.5)    | 6.5 (5.6, 7.9) | 0.67    |
| eGFR (mL/min per 1.73 m <sup>2</sup> ) | 39 (25, 61)      | 44 (27, 62)       | 33 (16, 54)    | 0.014   |
| UACR (g/g)                             | 1.4 (0.5, 3.2)   | 1.2 (0.5, 2.7)    | 1.9 (1.2, 4.4) | 0.0086  |
| Pathological characteristics           |                  |                   |                |         |
| RPS DN Classification                  |                  |                   |                | 0.26    |
| Class I                                | 6                | 7                 | 0              |         |
| Class IIa                              | 20               | 23                | 7              |         |
| Class IIb                              | 28               | 29                | 23             |         |
| Class III                              | 32               | 27                | 54             |         |
| Class IV                               | 14               | 14                | 16             |         |
| IFTA                                   |                  |                   |                | 0.16    |
| 0                                      | 6                | 7                 | 2              |         |
| 1                                      | 28               | 30                | 16             |         |
| 2                                      | 33               | 31                | 42             |         |
| 3                                      | 33               | 32                | 40             |         |
| Interstitial inflammation              |                  |                   |                |         |
| 0                                      | 10               | 11                | 5              | 0.44    |
| 1                                      | 77               | 76                | 81             |         |
| 2                                      | 13               | 13                | 14             |         |
| Arteriolar hyalinosis                  |                  |                   |                | 0.084   |
| 0                                      | 6                | 6                 | 2              |         |
| 1                                      | 13               | 15                | 5              |         |
| 2                                      | 81               | 79                | 93             |         |
| Arteriosclerosis                       |                  |                   |                | 0.79    |
| 0                                      | 7                | 6                 | 9              |         |
| 1                                      | 47               | 48                | 47             |         |
| 2                                      | 46               | 46                | 44             |         |
| Diffuse                                |                  |                   |                | 0.061   |
| 0                                      | 6                | 7                 | 0              |         |
| 1                                      | 15               | 19                | 0              |         |
| 2                                      | 33               | 33                | 35             |         |
| 3                                      | 46               | 41                | 65             |         |
| Exudative                              | 66               | 60                | 90             | 0.012   |
| Subendothelial space widening          | 67               | 65                | 80             | 0.20    |
| Mesangiolysis/microaneurysm            | 46               | 41                | 65             | 0.053   |
| Perihilar neovascularization           | 81               | 77                | 95             | 0.069   |

BMI, body mass index; RAAS, renin-angiotensin-aldosterone system blockade; LDL-C, low-density-lipoprotein cholesterol; HDL-C, high-density-lipoprotein cholesterol; eGFR, estimated glomerular filtration rate; UACR, urine albumin to creatinine ratio. RPS DN classification, Renal Pathology Society classification of diabetic nephropathy; I; Mild or nonspecific light microscopy changes and electron microscopy-proven glomerular membrane thickening; IIa; Mild mesangial expansion; IIb, Severe mesangial expansion; III; Nodular sclerosis (Kimmelstiel-Wilson lesion); IV, Advanced diabetic glomerulosclerosis; IFTA, interstitial fibrosis and tubular atrophy. Data are expressed as the mean (standard deviation), median (25<sup>th</sup>, 75<sup>th</sup> percentiles), or percentage.

**Table S2. Correlation between retinal findings and renal lesions**

|                                        | Microaneurysms | Retinal dot and blot hemorrhages | Hard exudates or cotton wool spots | Intraretinal microvascular abnormality | Neovascularization | Vitreous or preretinal hemorrhages | Diabetic macular edema | Diffuse lesions | Exudative lesions | Nodular lesions | IFTA   | Interstitial inflammation | Arteriolar hyalinosis | Arterioatherosclerosis | Perihilar neovascularization |
|----------------------------------------|----------------|----------------------------------|------------------------------------|----------------------------------------|--------------------|------------------------------------|------------------------|-----------------|-------------------|-----------------|--------|---------------------------|-----------------------|------------------------|------------------------------|
| Microaneurysms                         | 1.00           |                                  |                                    |                                        |                    |                                    |                        |                 |                   |                 |        |                           |                       |                        |                              |
| Retinal dot and blot hemorrhages       | -0.18*         | 1.00                             |                                    |                                        |                    |                                    |                        |                 |                   |                 |        |                           |                       |                        |                              |
| Hard exudates or cotton wool spots     | -0.13          | 0.51***                          | 1.00                               |                                        |                    |                                    |                        |                 |                   |                 |        |                           |                       |                        |                              |
| Intraretinal microvascular abnormality | 0.10           | 0.14*                            | -0.11                              | 1.00                                   |                    |                                    |                        |                 |                   |                 |        |                           |                       |                        |                              |
| Neovascularization                     | -0.07          | 0.25***                          | 0.28**                             | 0.07                                   | 1.00               |                                    |                        |                 |                   |                 |        |                           |                       |                        |                              |
| Vitreous or preretinal hemorrhages     | -0.11          | 0.22**                           | 0.23**                             | 0.02                                   | 0.11               | 1.00                               |                        |                 |                   |                 |        |                           |                       |                        |                              |
| Diabetic macular edema                 | -0.13          | 0.29***                          | 0.25**                             | 0.05                                   | 0.30***            | 0.20***                            | 1.00                   |                 |                   |                 |        |                           |                       |                        |                              |
| Diffuse lesions                        | 0.11           | 0.50***                          | 0.36**                             | 0.14                                   | 0.22*              | 0.10                               | 0.25*                  | 1.00            |                   |                 |        |                           |                       |                        |                              |
| Exudative lesions                      | 0.00           | 0.23*                            | 0.23*                              | -0.19                                  | 0.08               | 0.17                               | 0.25*                  | 0.49**          | 1.00              |                 |        |                           |                       |                        |                              |
| Nodular lesions                        | -0.05          | 0.27**                           | 0.27*                              | -0.14                                  | -0.07              | 0.17                               | 0.16                   | 0.60**          | 0.38**            | 1.00            |        |                           |                       |                        |                              |
| IFTA                                   | 0.10           | 0.25***                          | 0.23**                             | 0.02                                   | 0.12               | 0.14                               | 0.13*                  | 0.61**          | 0.55**            | 0.41**          | 1.00   |                           |                       |                        |                              |
| Interstitial inflammation              | -0.04          | 0.18*                            | 0.20*                              | 0.00                                   | 0.02               | 0.12                               | 0.06                   | 0.27*           | 0.41**            | 0.07            | 0.50** | 1.00                      |                       |                        |                              |
| Arteriolar hyalinosis                  | 0.07           | 0.22***                          | 0.10                               | 0.13                                   | -0.01              | 0.01                               | 0.13*                  | 0.47**          | 0.34**            | 0.29*           | 0.48** | 0.41***                   | 1.00                  |                        |                              |
| Arterioatherosclerosis                 | 0.11           | 0.08                             | 0.01                               | 0.01                                   | 0.02               | 0.05                               | -0.03                  | 0.24*           | 0.21*             | 0.25            | 0.38** | 0.23***                   | 0.30**                | 1.00                   |                              |
| Polar vasculosis                       | -0.05          | 0.32*                            | 0.05                               | 0.07                                   | 0.09               | 0.19                               | 0.18                   | 0.48**          | 0.27**            | 0.28*           | 0.35** | 0.11                      | 0.29**                | 0.14                   | 1.00                         |

Spearman's Correlation coefficients,  $r$ , between the International Clinical Diabetic Retinopathy Disease Severity Scale and renal lesions, were obtained using Spearman's correlation rank test. \* $P$ -value<0.05; \*\* $P$ -value<0.01; \*\*\* $P$ -value<0.001.

**Table S3. Adjusted Risk for ESKD, CVD, and all-cause death, among patients with diabetic macular edema, as compared with patients with no diabetic macular edema**

| Model | ESKD                                | CVD                                | All-cause death                    |
|-------|-------------------------------------|------------------------------------|------------------------------------|
|       | DME                                 | DME                                | DME                                |
| 1     | 1.99 (1.30-3.05)<br><i>P</i> =0.002 | 1.27 (0.63-2.56)<br><i>P</i> =0.51 | 0.64 (0.27-1.52)<br><i>P</i> =0.31 |
| 2     | 1.94 (1.25-2.99)<br><i>P</i> =0.003 | 1.31 (0.64-2.67)<br><i>P</i> =0.13 | 0.74 (0.30-1.78)<br><i>P</i> =0.50 |
| 3     | 1.11 (0.70-1.75)<br><i>P</i> =0.66  | 1.38 (0.65-2.92)<br><i>P</i> =0.40 | 0.59 (0.23-1.50)<br><i>P</i> =0.26 |

DME, diabetic macular edema; ESKD, end-stage kidney disease; CVD, cardiovascular disease. Hazard ratios (95% confidence interval) and *P*-values were determined for demographic and laboratory characteristics by univariable and multivariable Cox proportional hazard models. Model 1: univariable (no diabetic retinopathy as reference). Model 2: model 1 + adjusted for demographic characteristics (age, gender, BMI, diabetic duration, ever having smoked and systolic blood pressure). Model 3: model 2 + adjusted for laboratory characteristics (hemoglobin A1c, triglycerides, eGFR, and UACR).
