# Supplementary figures and images for: Retinopathy progression and the risk of end-stage kidney disease: results from a longitudinal Japanese cohort of 232 patients with type 2 diabetes and biopsy-proven diabetic kidney disease
Source: PubMed Central journal article supplement — BMJ Open Diabetes Res Care. 2019 Nov 2;7(1):e000726. doi: 10.1136/bmjdrc-2019-000726 (PMC6861100; doi:10.1136/bmjdrc-2019-000726), 2019-11-02

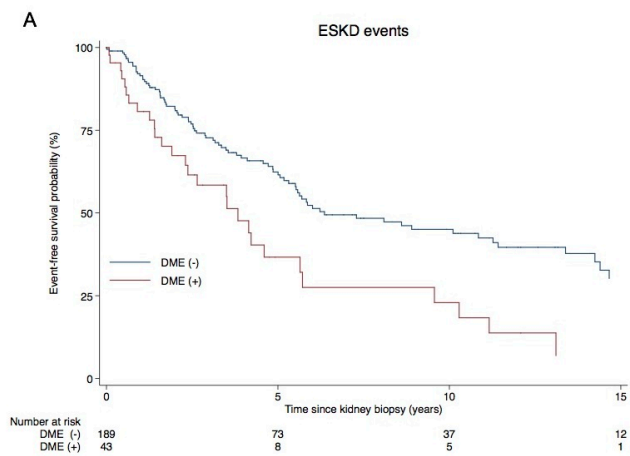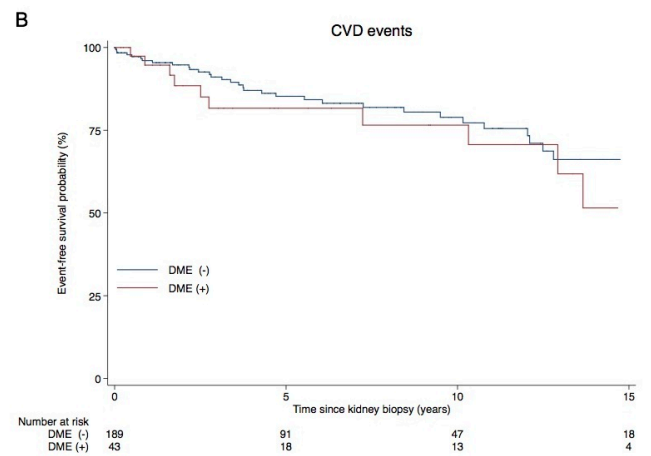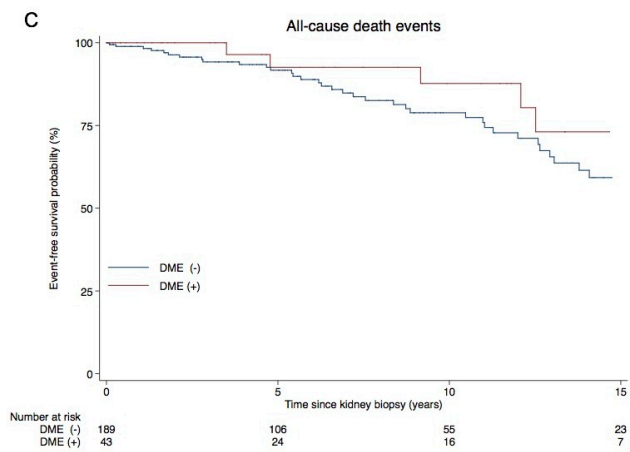

Supplement: bmjdrc-2019-000726supp002.pdf [file bmjdrc-2019-000726supp002.pdf]
